# Supplementary material for: Matrix Metalloproteinases Polymorphisms as Prognostic Biomarkers in Malignant Pleural Mesothelioma
Source: Hindawi journal article supplement (doi:10.1155/2017/8069529), 2017-01-01
Supplement: f1 [file 8069529.f1.pdf]

Supplementary table 1: The influence of *MMP* genotypes on time to progression and overall survival in MPM patients.

| Gene     | Genotype | Time to progression   |                     |       | Overall survival       |                     |       |
|----------|----------|-----------------------|---------------------|-------|------------------------|---------------------|-------|
|          |          | Median<br>(25%-75%)   | HR<br>(95% CI)      | P     | Median<br>(25%-75%)    | HR (95% CI)         | P     |
| MMP2     |          |                       |                     |       |                        |                     |       |
| rs243865 | CC       | 8.83<br>(6.43-15.03)  | Ref.                |       | 17.43<br>(10.60-27.27) | Ref.                |       |
|          | CT       | 10.17<br>(6.00-16.33) | 0.91<br>(0.66-1.25) | 0.547 | 17.47<br>(9.47-31.17)  | 0.91<br>(0.65-1.28) | 0.605 |
|          | TT       | 14.97<br>(8.20-44.57) | 0.55<br>(0.17-1.74) | 0.309 | 30.00<br>(22.03-30.00) | 0.38<br>(0.09-1.54) | 0.173 |
|          | CT+TT    | 10.20<br>(6.27-16.33) | 0.88<br>(0.64-1.2)  | 0.418 | 18.07<br>(9.63-31.17)  | 0.87<br>(0.62-1.22) | 0.416 |
| rs243849 | CC       | 9.87<br>(6.13-16.67)  | Ref.                |       | 19.10<br>(9.83-28.13)  | Ref.                |       |
|          | CT       | 8.67<br>(6.67-14.30)  | 1.05<br>(0.75-1.49) | 0.769 | 16.23<br>(10.80-29.03) | 1.05<br>(0.72-1.52) | 0.795 |
|          | TT       | 7.33<br>(3.27-11.80)  | 1.34<br>(0.65-2.75) | 0.424 | 17.63<br>(7.33-36.73)  | 0.89<br>(0.39-2.02) | 0.774 |
|          | CT+TT    | 8.67<br>(6.60-14.30)  | 1.09<br>(0.79-1.51) | 0.610 | 16.63<br>(10.80-30.27) | 1.02<br>(0.72-1.46) | 0.892 |
| rs7201   | AA       | 9.27<br>(6.37-16.93)  | Ref.                |       | 16.23<br>(10.63-28.03) | Ref.                |       |
|          | AC       | 10.00<br>(6.73-15.03) | 0.97<br>(0.69-1.36) | 0.867 | 19.30<br>(10.80-30.00) | 0.95<br>(0.66-1.36) | 0.760 |
|          | CC       | 8.00                  | 1.15                | 0.535 | 14.20                  | 1.19                | 0.453 |

|             |       |                       |                                   |              |                        |                                   |              |
|-------------|-------|-----------------------|-----------------------------------|--------------|------------------------|-----------------------------------|--------------|
|             |       | (5.50-12.63)          | (0.74-1.78)                       |              | (9.23-26.17)           | (0.75-1.90)                       |              |
|             | AC+CC | 9.80<br>(6.43-14.57)  | 1.02<br>(0.74-1.4)                | 0.924        | 18.07<br>(9.63-29.03)  | 1.00<br>(0.71-1.41)               | 0.980        |
| <i>MMP9</i> |       |                       |                                   |              |                        |                                   |              |
| rs17576     | AA    | 9.27<br>(6.13-13.53)  | Ref.                              |              | 13.57<br>(9.83-23.90)  | Ref.                              |              |
|             | AG    | 10.73<br>(6.80-18.47) | 0.75<br>(0.54-1.04)               | 0.083        | 21.20<br>(12.17-32.53) | <b>0.70</b><br><b>(0.49-0.98)</b> | <b>0.041</b> |
|             | GG    | 8.50<br>(6.00-16.67)  | 1.17<br>(0.69-1.97)               | 0.557        | 16.63<br>(8.27-26.60)  | 1.04<br>(0.60-1.81)               | 0.884        |
|             | AG+GG | 10.00<br>(6.67-16.90) | 0.81<br>(0.59-1.1)                | 0.172        | 19.30<br>(11.33-31.17) | 0.74<br>(0.53-1.03)               | 0.079        |
| rs2250889   | CC    | 10.03<br>(6.73-16.67) | Ref.                              |              | 19.10<br>(11.33-30.00) | Ref.                              |              |
|             | CG    | 6.07<br>(4.07-7.90)   | <b>2.45</b><br><b>(1.45-4.14)</b> | <b>0.001</b> | 9.23<br>(4.53-14.20)   | <b>2.39</b><br><b>(1.37-4.18)</b> | <b>0.002</b> |
| rs17577     | GG    | 10.00<br>(6.60-16.33) | Ref.                              |              | 18.07<br>(10.60-28.30) | Ref.                              |              |
|             | GA    | 8.33<br>(5.50-14.57)  | 1.19<br>(0.84-1.67)               | 0.322        | 17.63<br>(9.47-32.87)  | 0.91<br>(0.62-1.32)               | 0.609        |
|             | AA    | 8.83<br>(8.00-19.43)  | 1.15<br>(0.37-3.63)               | 0.809        | 13.50<br>(9.97-25.93)  | 1.51<br>(0.48-4.78)               | 0.481        |
|             | GA+AA | 8.50<br>(5.53-14.57)  | 1.19<br>(0.85-1.66)               | 0.317        | 17.63<br>(9.63-32.53)  | 0.93<br>(0.65-1.35)               | 0.717        |
| rs20544     | CC    | 7.53<br>(5.53-11.53)  | Ref.                              |              | 13.50<br>(8.13-21.20)  | Ref.                              |              |
|             | CT    | 10.93                 | <b>0.57</b>                       | <b>0.007</b> | 20.67                  | <b>0.56</b>                       | <b>0.007</b> |

|              |       |                       |                                   |              |                        |                                   |              |
|--------------|-------|-----------------------|-----------------------------------|--------------|------------------------|-----------------------------------|--------------|
|              |       | (7.37-19.97)          | <b>(0.38-0.86)</b>                |              | (11.33-32.53)          | <b>(0.37-0.85)</b>                |              |
|              | TT    | 9.40<br>(6.27-14.30)  | 0.72<br>(0.47-1.11)               | 0.139        | 15.40<br>(10.80-25.67) | 0.70<br>(0.44-1.11)               | 0.133        |
|              | CT+TT | 10.13<br>(6.73-16.20) | <b>0.63</b><br><b>(0.43-0.91)</b> | <b>0.015</b> | 19.30<br>(10.80-31.17) | <b>0.61</b><br><b>(0.41-0.90)</b> | <b>0.014</b> |
| <i>MMP14</i> |       |                       |                                   |              |                        |                                   |              |
| rs1042703    | TT    | 9.27<br>(6.67-16.33)  | Ref.                              |              | 17.50<br>(9.97-29.13)  | Ref.                              |              |
|              | TC    | 10.17<br>(6.27-14.53) | 1.03<br>(0.73-1.45)               | 0.879        | 19.30<br>(9.47-29.03)  | 1.10<br>(0.77-1.57)               | 0.594        |
|              | CC    | 8.70<br>(5.13-16.20)  | 1.28<br>(0.68-2.38)               | 0.442        | 12.70<br>(7.07-20.60)  | <b>1.92</b><br><b>(1.02-3.61)</b> | <b>0.043</b> |
|              | TC+CC | 10.17<br>(6.03-14.97) | 1.07<br>(0.77-1.47)               | 0.695        | 17.63<br>(8.30-28.30)  | 1.20<br>(0.86-1.67)               | 0.284        |
| rs1042704    | GG    | 9.80<br>(6.73-14.90)  | Ref.                              |              | 17.50<br>(10.80-31.17) | Ref.                              |              |
|              | GA    | 8.30<br>(5.70-16.20)  | 1.08<br>(0.77-1.52)               | 0.655        | 17.47<br>(9.10-24.23)  | 1.35<br>(0.94-1.92)               | 0.101        |
|              | AA    | 7.87<br>(6.00-16.90)  | 1.01<br>(0.53-1.94)               | 0.971        | 20.27<br>(13.57-25.93) | 0.95<br>(0.46-1.95)               | 0.884        |
|              | GA+AA | 8.30<br>(5.93-16.90)  | 1.07<br>(0.78-1.47)               | 0.686        | 18.07<br>(9.63-24.57)  | 1.27<br>(0.90-1.77)               | 0.170        |
| rs743257     | CC    | 9.87<br>(7.07-14.07)  | Ref.                              |              | 13.50<br>(9.97-27.27)  | Ref.                              |              |
|              | CT    | 9.40                  | 0.85                              | 0.416        | 15.40                  | 0.87                              | 0.512        |

|       |                      |                     |       |                        |                     |       |
|-------|----------------------|---------------------|-------|------------------------|---------------------|-------|
|       | (5.97-19.43)         | (0.58-1.26)         |       | (6.80-28.13)           | (0.58-1.31)         |       |
| TT    | 9.70<br>(6.60-14.53) | 0.97<br>(0.65-1.46) | 0.901 | 20.17<br>(12.53-31.17) | 0.79<br>(0.52-1.22) | 0.287 |
| CT+TT | 9.43<br>(6.07-16.33) | 0.9<br>(0.63-1.29)  | 0.575 | 19.30<br>(9.83-30.27)  | 0.84<br>(0.58-1.21) | 0.346 |
